# Supplementary material for: A novel C6N2monolayer as a potential material for charge-controlled CO2capture
Source: Royal Society of Chemistry journal article supplement (doi:10.1039/c9tc06921f), 2020-01-01
Supplement: c9tc06921f1.pdf [file c9tc06921f1.pdf]

# Supporting Information

## A novel $C_6N_2$ monolayer as a potential material

### for charge-controlled $CO_2$ capture

C. He<sup>1</sup>, M. Zhang<sup>1</sup>, T.T. Li<sup>1</sup>, W.X. Zhang<sup>2\*</sup>

<sup>1</sup> State Key Laboratory for Mechanical Behavior of Materials, School of Materials Science and Engineering, Xi'an Jiaotong University, Xi'an 710049, China

<sup>2</sup> School of Materials Science and Engineering, Chang'an University, Xi'an 710064, China

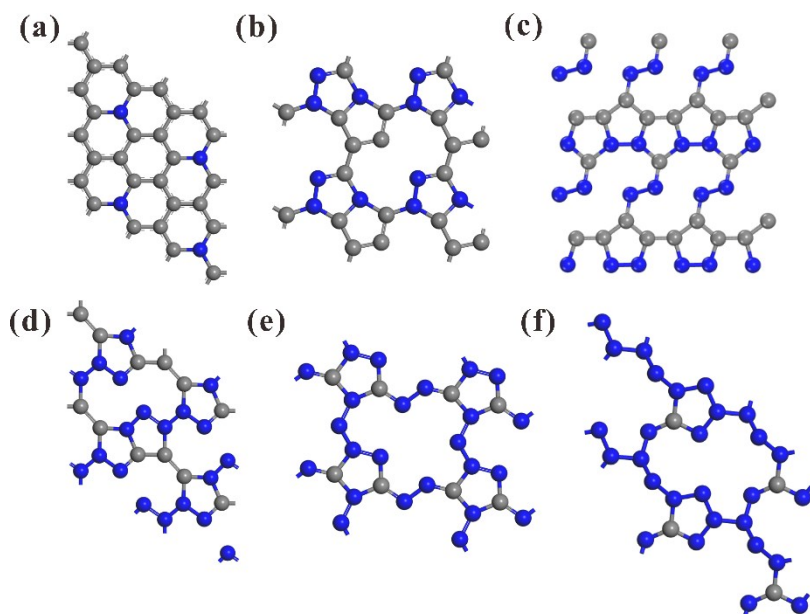

Fig. S1 (a)-(f) the structure of  $C_7N$ ,  $C_5N_3$ ,  $C_4N_4$ ,  $C_3N_5$ ,  $C_2N_6$  and  $CN_7$  monolayers.

---

\*Corresponding Author: W. X. Zhang (wxzhang@chd.edu.cn)

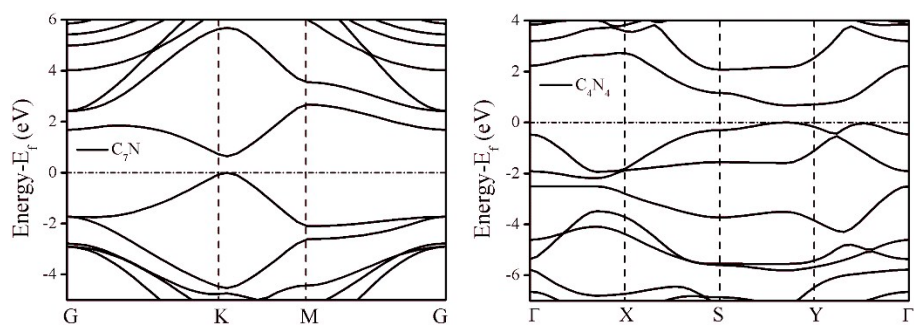

Fig. S2 Band structures of  $C_7N$  and  $C_4N_4$ .

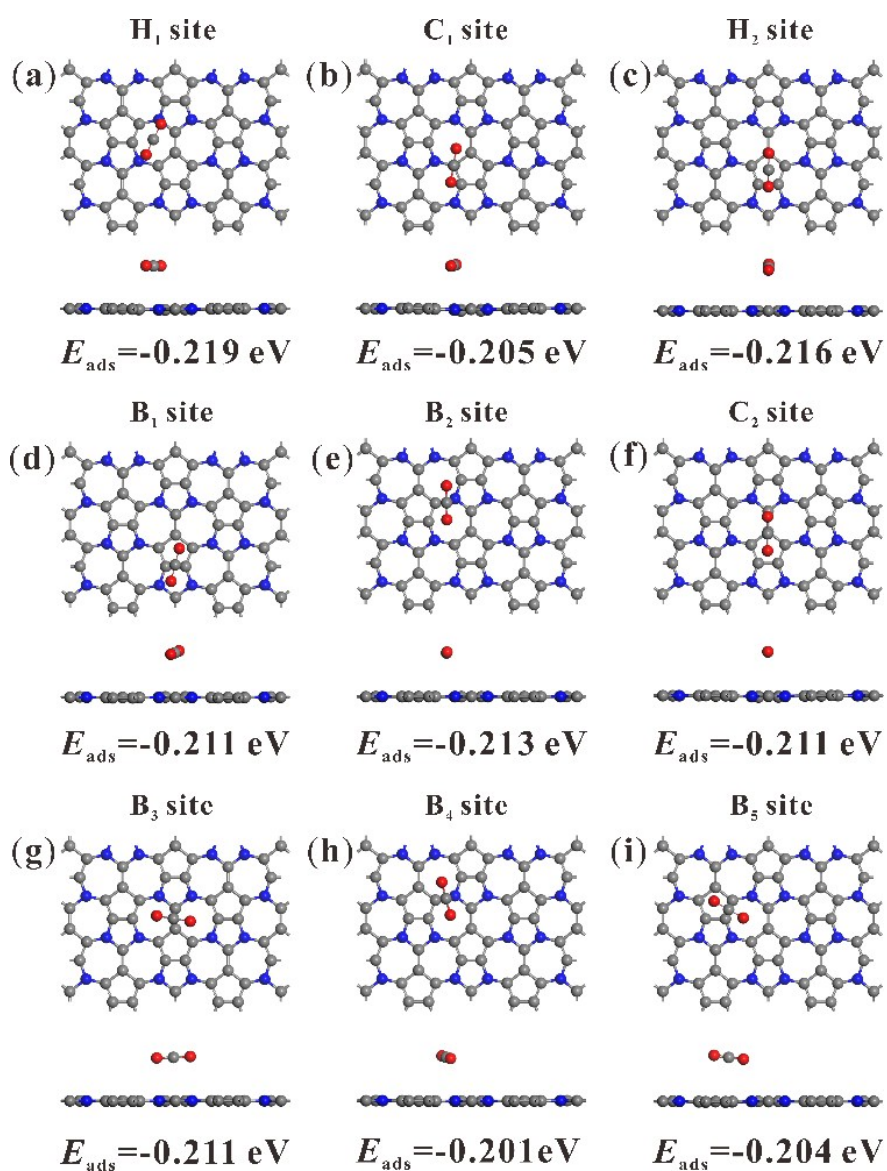

Fig. S3 The stable configurations of  $CO_2$  on neutral  $C_6N_2$  nanosheet with different adsorption sites.

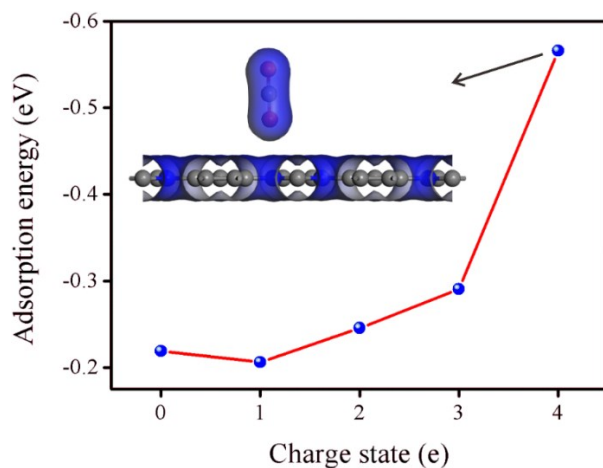

Fig. S4 Adsorption energy of CO<sub>2</sub> as a function of the positively charged C<sub>6</sub>N<sub>2</sub> monolayer. Internally, the charge density distribution under four positive charges is shown.

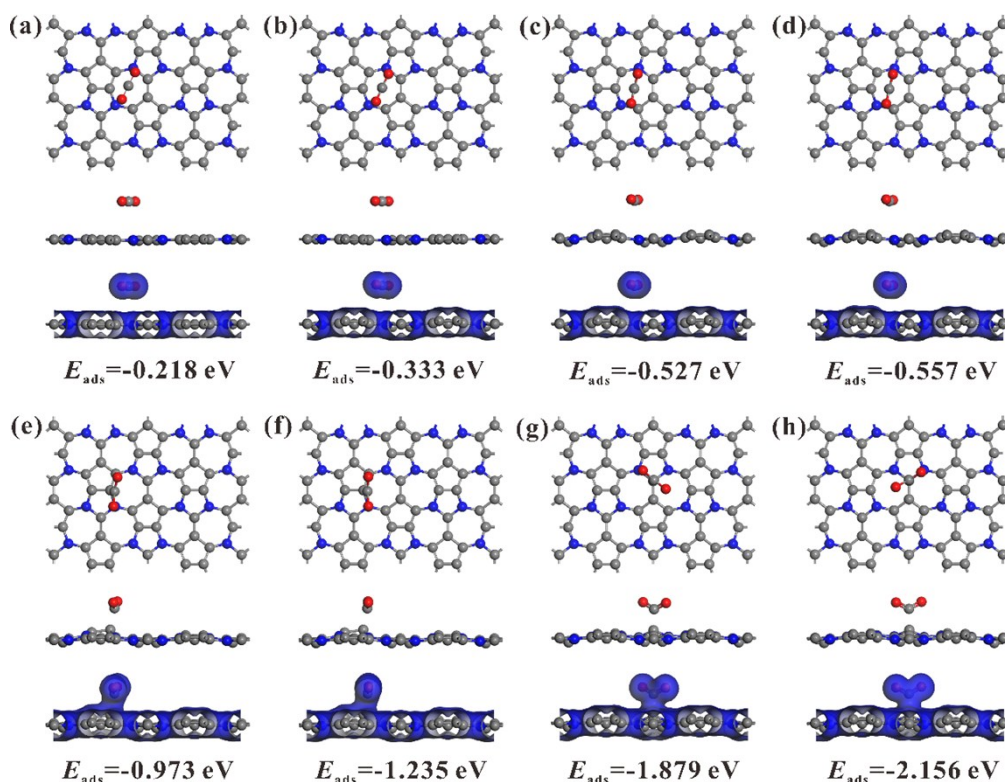

Fig. S5 The stable configurations and total charge density distribution of CO<sub>2</sub> on (a) 0 e<sup>-</sup>, (b) 1 e<sup>-</sup>, (c) 2 e<sup>-</sup>, (d) 2.1 e<sup>-</sup>, (e) 2.2 e<sup>-</sup>, (f) 2.5 e<sup>-</sup>, (g) 2.7 e<sup>-</sup> and (h) 3 e<sup>-</sup> charged C<sub>6</sub>N<sub>2</sub> monolayer.

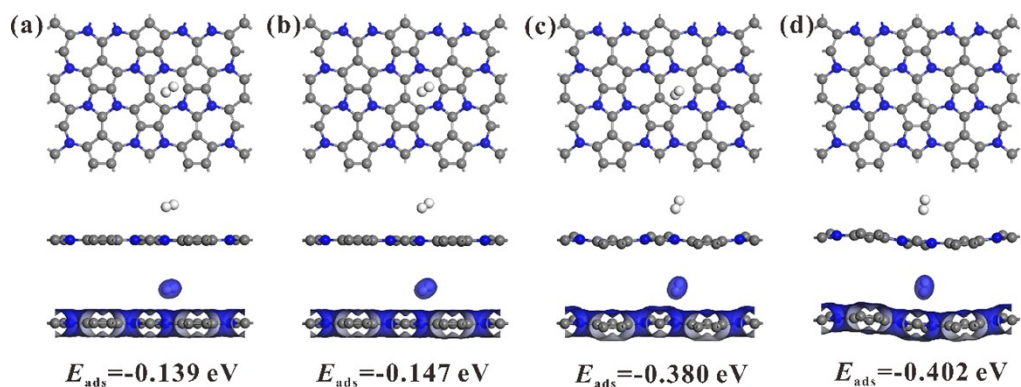

Fig. S6 The stable configurations and total charge density distribution of  $\text{H}_2$  on (a)  $0 e^-$ , (b)  $1 e^-$ , (c)  $2 e^-$ , (d)  $3 e^-$  charged  $\text{C}_6\text{N}_2$  monolayer.

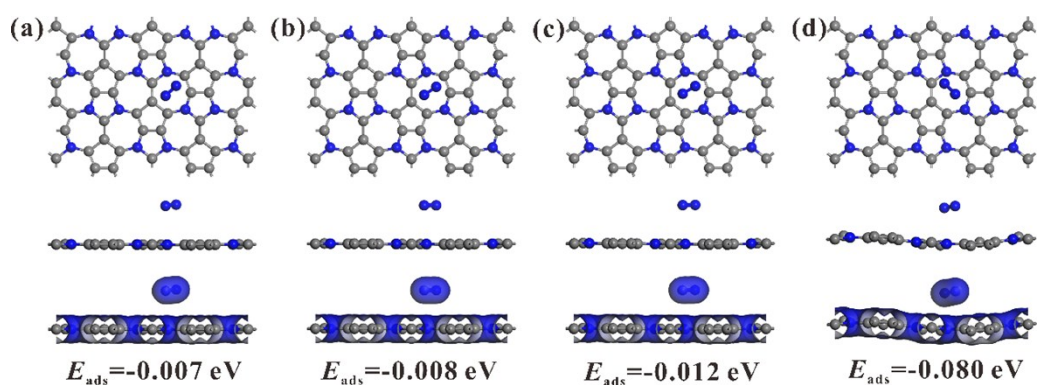

Fig. S7 The stable configurations and total charge density distribution of  $\text{N}_2$  on (a)  $0 e^-$ , (b)  $1 e^-$ , (c)  $2 e^-$ , (d)  $3 e^-$  charged  $\text{C}_6\text{N}_2$  monolayer.

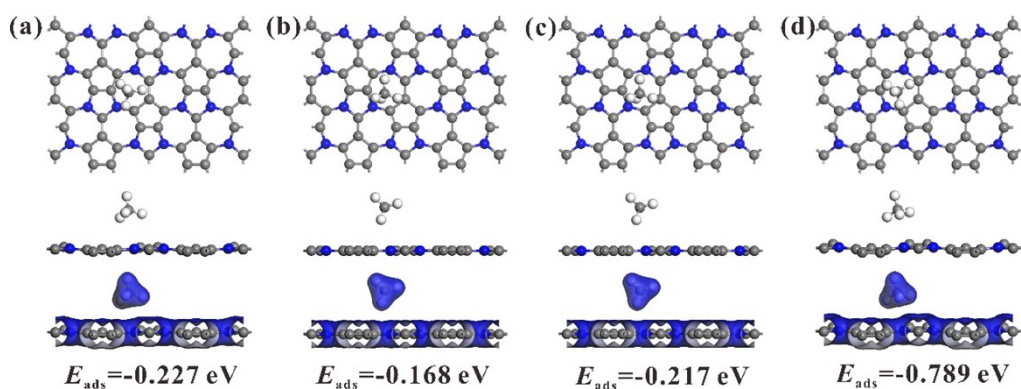

Fig. S8 The stable configurations and total charge density distribution of  $\text{CH}_4$  on (a)  $0 e^-$ , (b)  $1 e^-$ , (c)  $2 e^-$ , (d)  $3 e^-$  charged  $\text{C}_6\text{N}_2$  monolayer.

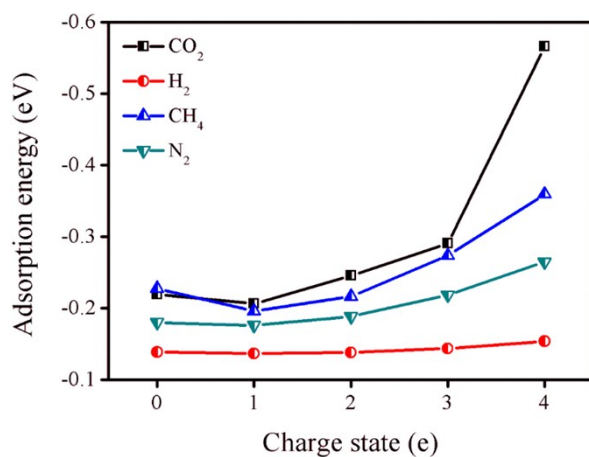

Fig. S9 Adsorption energy of CO<sub>2</sub>, H<sub>2</sub>, CH<sub>4</sub> and N<sub>2</sub> as a function of positively charged C<sub>6</sub>N<sub>2</sub> monolayer.

Table S1 The *G* values crossing the Fermi level for the absorption systems of CO<sub>2</sub>, H<sub>2</sub>, CH<sub>4</sub>, or N<sub>2</sub> on C<sub>6</sub>N<sub>2</sub> monolayer with different negatively charges state.

|                       | <b>0</b> | <b>1</b> | <b>2</b> | <b>3</b> |
|-----------------------|----------|----------|----------|----------|
| <b>CO<sub>2</sub></b> | 2        | 10       | 10       | 6        |
| <b>H<sub>2</sub></b>  | 2        | 10       | 10       | 12       |
| <b>CH<sub>4</sub></b> | 6        | 10       | 10       | 8        |
| <b>N<sub>2</sub></b>  | 2        | 10       | 10       | 10       |
